# Supplementary material
Source: publisher figshare collection journal article supplement (https://acs.figshare.com/ndownloader/files/11450030)
Supplement: Supplementary file 1 [file 11450030]

## **Supporting Information (SI)**

### **Significant Enhancement of Visible Light-Driven Hydrogen Evolution by Structure Regulation of Carbon Nitrides**

*Qing Han<sup>\*</sup>, Zhihua Cheng, Bing Wang, Huiming Zhang<sup>\*</sup> and Liangti Qu<sup>\*</sup>*

Key Laboratory of Photoelectronic/Electrophotonic Conversion Materials, Key Laboratory of Cluster Science, Ministry of Education of China, School of Chemistry and Chemical Engineering, Beijing Institute of Technology, Beijing 100081, P. R. China.

<sup>\*</sup>Email: qhan@bit.edu.cn; huimin@bit.edu.cn; lqu@bit.edu.cn

#### **This supporting information file includes:**

Experimental Section

Supported Figures and Table

References

## PART I: EXPERIMENTAL SECTION

**Photochemical measurement.** Wavelength dependence of H<sub>2</sub> evolution rate was measured by using appropriate band pass filters (400, 420, 450, 500 and 550 nm, respectively) to perform the water splitting experiment under the designated monochromatic light. The intensity of the monochromatic light was averaged at 13 representative points by CEL-NP 2000 Photoradiometer and the active area of the reactor was approximately 38.5 cm<sup>2</sup>. The external quantum yield was then calculated by the following Equation (1):

$$\Phi = \frac{2 \times \text{amount of H}_2 \text{ molecules evolved}}{\text{number of incident photons}} \times 100 \quad (1)$$

The turnover number (TON) was estimated by the following Equation (2):

$$\text{TON} = \frac{\text{moles of H}_2 \text{ molecules evolved}}{\text{moles of platinum on the photocatalyst}} \quad (2)$$

## PARPT II: SUPPORTED FIGURES

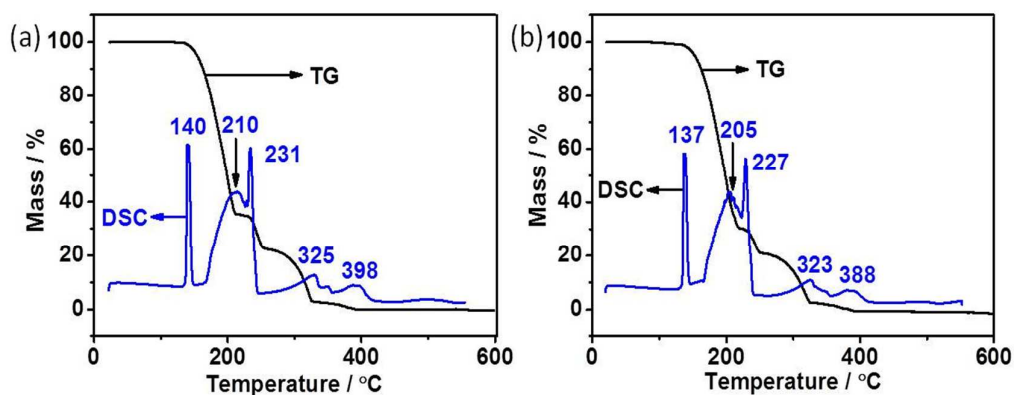

**Figure S1.** Thermogravimetric-differential scanning calorimetry (TG-DSC) thermograms of (a) pristine urea and (b) SRU-100.

Comparing with pristine urea (Figure S1a), TG-DSC analysis (Figure S1b) of SRU-100 shows decrease in temperature at the melting point (137 °C vs. 140 °C), the reaction of urea to cyanamide (205 °C vs. 210 °C), the thermal condensation of cyanamide into melamine (227 °C vs. 231 °C), the further condensation of melamine into melem (323 °C vs. 325 °C), and the formation of carbon nitride (388 °C vs. 398 °C), respectively. This result indicates the decreased precursor size leads to decreased temperature of the thermal polycondensation and evaporation.

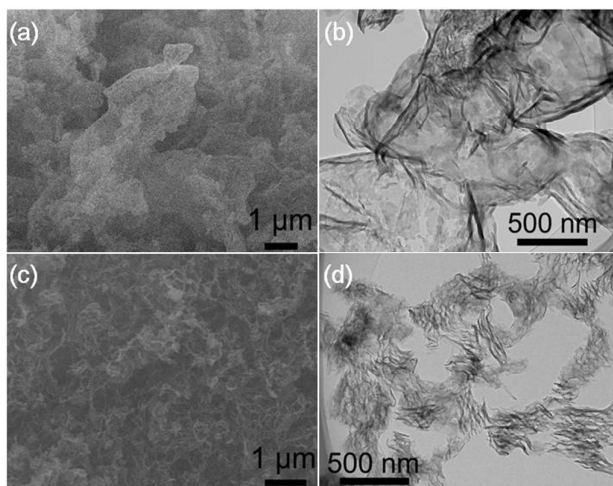

**Figure S2.** (a) SEM, (b) TEM of GCN; (c) SEM, (d) TEM of DACN-100.

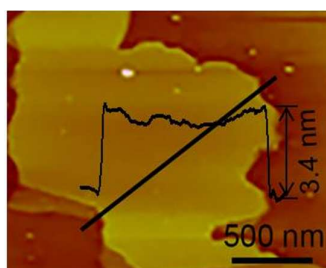

**Figure S3.** AFM images of DACN-100 and its height profile along the line.

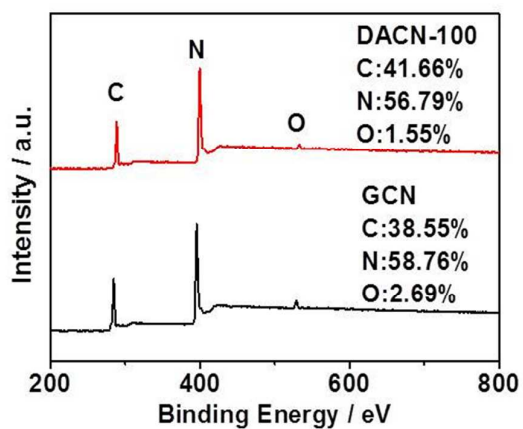

**Figure S4.** XPS spectra of GCN and DACN-100.

**Table S1.** The element content (at%) of GCN, DACN-100 determined by XPS.

| Sample   | C     | N     | O    | C/N  |
|----------|-------|-------|------|------|
| GCN      | 38.55 | 58.76 | 2.69 | 0.66 |
| DACN-100 | 41.66 | 56.79 | 1.55 | 0.73 |

**Table S2.** The relative percentages (at%) of the nitrogen and carbon species for GCN and DACN-100 obtained from XPS.

| Sample   | N <sub>2</sub> C | N <sub>3</sub> C | N-NH <sub>x</sub> | (N <sub>2</sub> )C(NH <sub>2</sub> ) | C-C  |
|----------|------------------|------------------|-------------------|--------------------------------------|------|
| GCN      | 63.2             | 25.9             | 10.9              | 83.2                                 | 16.8 |
| DACN-100 | 71.3             | 20.9             | 7.8               | 92.2                                 | 7.8  |

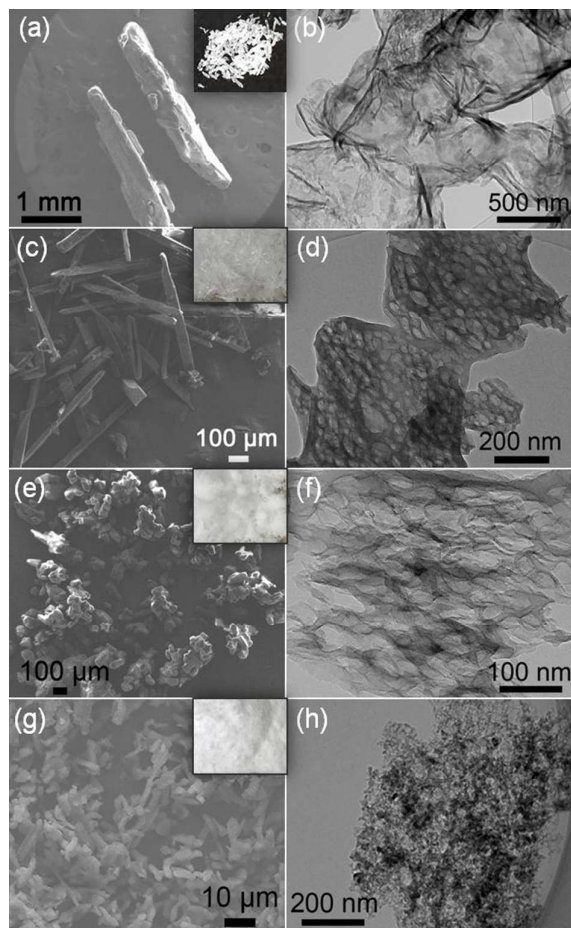

**Figure S5.** SEM images and Photographs (insets) of a) pristine urea, c) SRU-500, e) SRU-100 and g) SRU-10 and the corresponding TEM images of b) GCN, d) DACN-500, f) DACN-100 and h) DACN-10.

As shown in Figure S5, the pristine urea (Figure S5a) was altered to microcrystals of 500  $\mu\text{m}$  (SRU-500, Figure S5c) and 10  $\mu\text{m}$  (SRU-10, Figure S5g) under different conditions. The DACN samples obtained by calcination of SRU-500 and SRU-10 at 600  $^{\circ}\text{C}$  are notated as DACN-500 and DACN-10, respectively. TEM images reveal that the DACN-500 (Figure S5d) becomes rougher with respect to GCN (Figure S5b) and is enriched with aligned pores in range of 20-50 nm, suggesting the disruption of the long-range atomic order of two-dimension GCN in both perpendicular and parallel directions. The DACN-100 (Figure S5f) shows greater disorder than DACN-500 (Figure S5d) in which collapse of partial pore walls in one orientation of DACN-500. Further decrease of precursor grain size led to the formation of agglomerate fragments around 10 nm in size (DACN-10, Figure S5h). These speak for the degree of disorder in the atomic arrangement in carbon nitride materials increases with the reduction of precursor grain size.

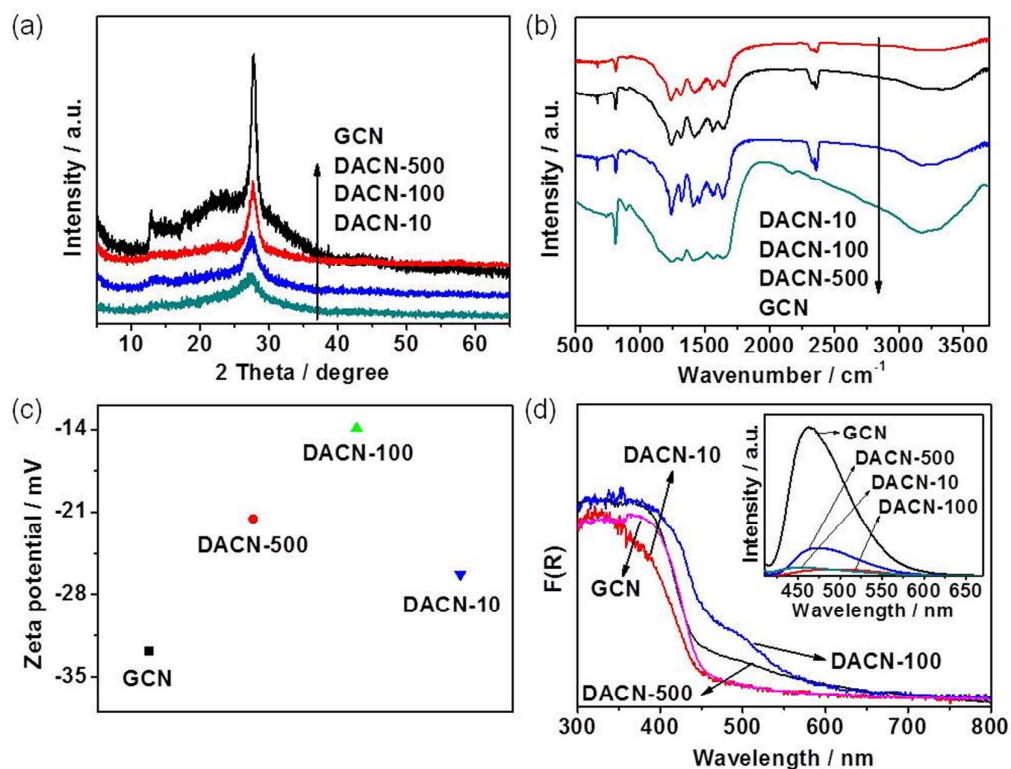

**Figure S6.** (a) XRD patterns, (b) FT-IR spectra, (c) Ratios of bonds within N1s core-level peak in different samples and (d) UV/Vis diffuse reflectance spectra (Inset: PL spectra) of GCN, DACN-500, DACN-100 and DACN-10.

As the particle size decreases, both the 13.0° and 27.7° peaks of DACN samples gradually weakened, as well as a downshift from 27.7° for GCN to 27.5° for DACN-500 and 27.3° for DACN-10 (Figure S6a), demonstrating gradually enhance destruction of in-plane and interlayer periodic structure as observed in TEM images (Figure S5). IR spectra (Figure S6b) reveal the DACN display gradual weakening N-H stretching peaks between 2900 and 3340 cm<sup>-1</sup>, demonstrating an increased loss of nitrogen atoms with the enhanced short-range structure. The C/N ratios increase from 3:4.6 (GCN) to 3:4.5 (DACN-500), 3:4.1 (DACN-100) and 3:2.2 (DACN-10), respectively (Figure S7a, Table S3, S4), further illustrating more and more severe loss of nitrogen atom. XPS spectra in N1s (Figure S7b, Figure S6c) show the percentage of N-H<sub>x</sub> decrease from 10.9 at% in GCN to 9.1 at% in DACN-500, 7.8 at% in DACN-100, implying decline in amino groups with the disrupted long-range atomic

order. As a consequence of the loss of  $\text{N-H}_x$  atoms, the ratio of  $\text{N}_{2\text{C}}/(\text{N}_{3\text{C}}+\text{N-H}_x)$  increases from 1.7 (GCN) to 2.2 (DACN-500), and reaches to a maximum of 2.5 for VACN-100. However, a further decrease of precursor size causes more amino groups (the content of  $\text{N-H}_x$  is 9.7 at% for DACN-10), and leads to a dramatic decrease in the ratio of  $\text{N}_{2\text{C}}/(\text{N}_{3\text{C}}+\text{N-H}_x)$  (1.9 for DACN-10). These results illustrate gradual removing of a portion of amine groups with reduction of urea sizes. A further decrease of urea size leads to increase in amino groups and decrease in  $\text{sp}^2$   $\text{C-N=C}$  bonds of DACN-10 possibly because of the cleavage of the  $\text{C-N}$  bonds during the thermal treatment. Further, the intensity of  $(\text{N}_2)\text{C}(\text{NH}_2)$  increases (Figure S8, Table S4), and zeta potential decreases (inset in Figure S6c), strong evidence that  $\text{NH}_x$  vacancies were gradually introduced into GCN. The redshift and blueshift in absorption edge was achieved for DACN-500 (475 nm) and DACN-10 (448 nm, Figure S6d), respectively, which should be attributed to the existence of holes and the quantum confinement effect.<sup>[s1]</sup> These redshift and blueshift can be also observed in the PL spectra of DACN-500 and DACN-10. In addition, the PL is gradually quenched for DACN samples with the urea size decrease, indicating that the changes in surface  $\text{NH}_x$  vacancies can improve charge separation.

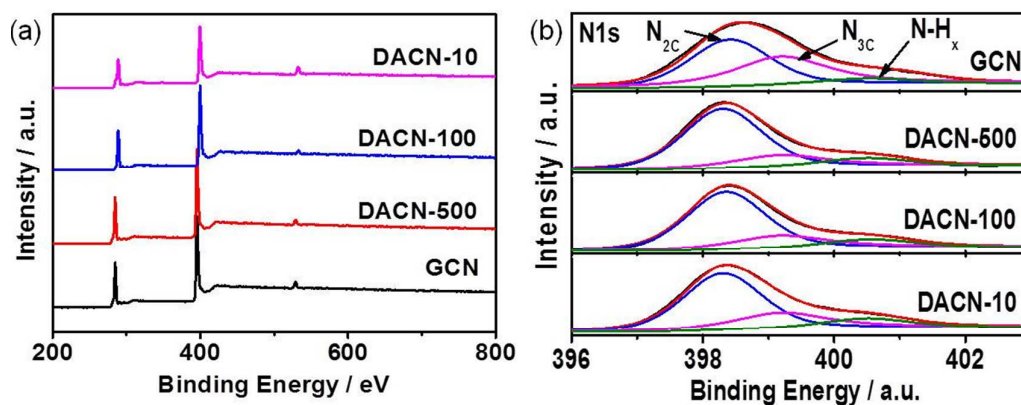

**Figure S7.** (a) XPS spectra and (b) the corresponding high-resolution N1s peak of GCN, DACN-500, DACN-100 and DACN-10.



**Table S3.** The element content (at%) of GCN, DACN-500, DACN-100 and DACN-10 determined by XPS.

| Sample   | C     | N     | O    | C/N  |
|----------|-------|-------|------|------|
| GCN      | 38.55 | 58.76 | 2.69 | 0.66 |
| DACN-500 | 39.16 | 58.81 | 2.03 | 0.67 |
| DACN-100 | 41.66 | 56.79 | 1.55 | 0.73 |
| DACN-10  | 47.76 | 45.41 | 6.84 | 1.05 |

**Table S4.** The relative percentages (at%) of the nitrogen and carbon species for GCN, DACN-500, DACN-100 and DACN-10 obtained from XPS.

| Sample   | N <sub>2</sub> C | N <sub>3</sub> C | N-NH <sub>x</sub> | (N <sub>2</sub> )C(NH <sub>2</sub> ) | C-C  |
|----------|------------------|------------------|-------------------|--------------------------------------|------|
| GCN      | 63.2             | 25.9             | 10.9              | 83.2                                 | 16.8 |
| DACN-500 | 68.7             | 22.2             | 9.1               | 87.6                                 | 12.4 |
| DACN-100 | 71.3             | 20.9             | 7.8               | 92.2                                 | 7.8  |
| DACN-10  | 66.1             | 24.2             | 9.7               | 86.9                                 | 13.1 |

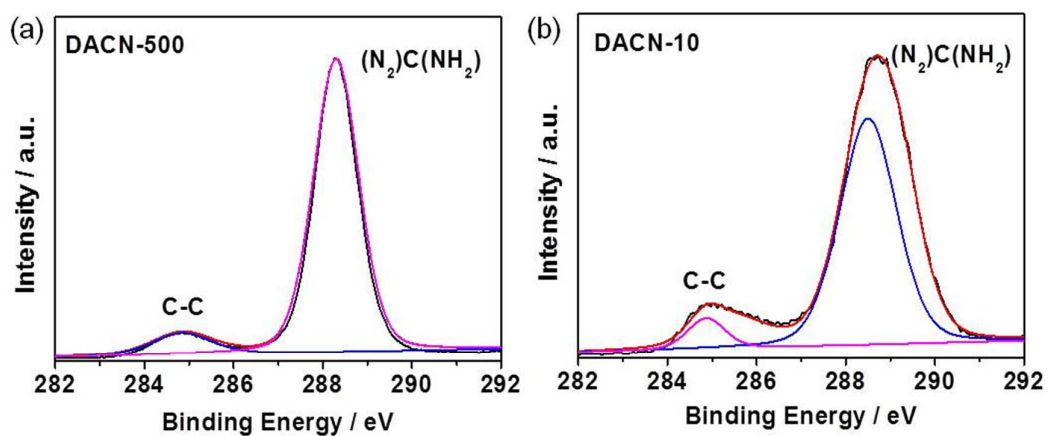

**Figure S8.** The corresponding high-resolution C1s peak of DACN-500 and DACN-10.

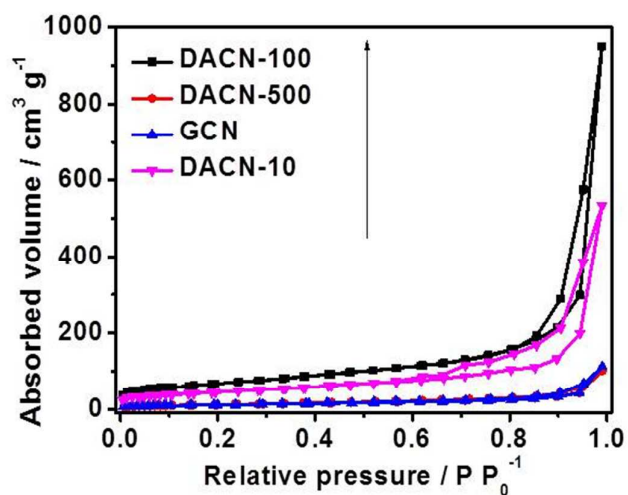

**Figure S9.** N<sub>2</sub> adsorption isotherms of GCN and DACN samples.

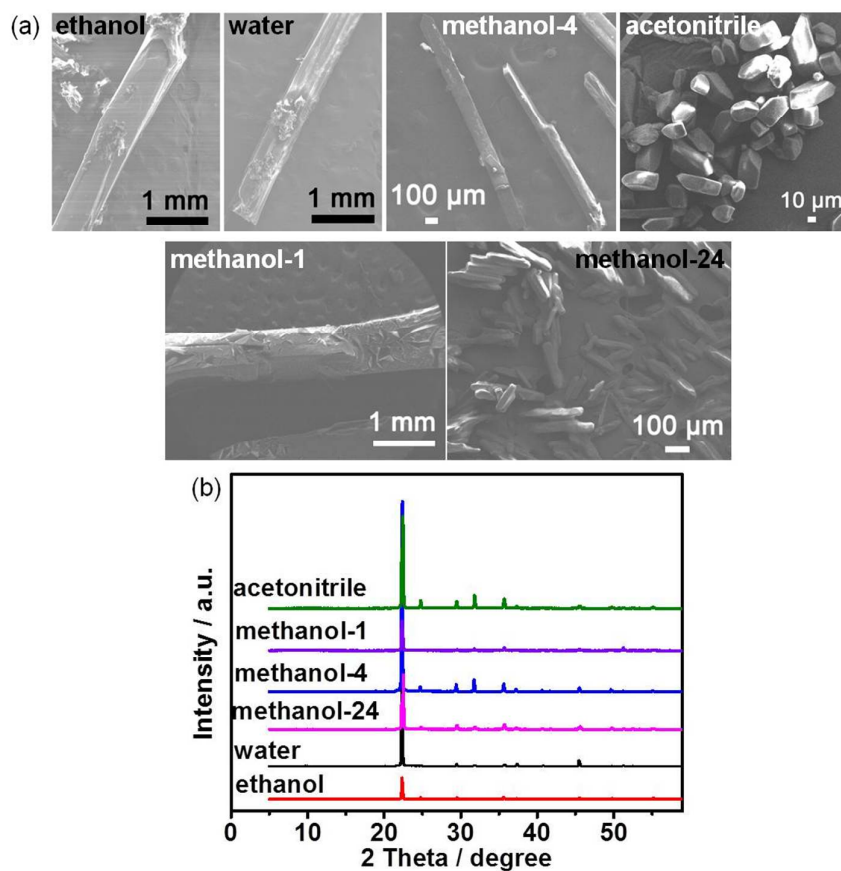

**Figure S10.** (a) SEM images, (b) XRD patterns of different urea crystals obtained from ethanol (U-ethanol), water (U-water), methanol (U-methanol-1, U-methanol-4 and U-methanol-24) and acetonitrile (U-acetonitrile), respectively. c) Photocatalytic activities of DACN samples derived from ethanol (U-ethanol-derived DACN), water

(U-water-derived DACN), methanol (U-methanol-1-derived DACN, U-methanol-4-derived DACN and U-methanol-24-derived DACN) and acetonitrile (U-acetonitrile-derived DACN), respectively.

To explain the size effect for the enhanced photocatalytic activities further, various urea crystals with different forms, morphologies and particle sizes were obtained from different solvents. Compared with pristine urea (Figure 2a), the U-ethanol shows a larger grain size, while others exhibit smaller grain size (Figure S10a). In addition, these urea crystals size is decreased in this order: U-ethanol > pristine urea > U-water > U-methanol > U-acetonitrile. The urea grains with different sizes display different XRD peak intensity (Figure S10b), because of their various morphologies with exposed face in varying degrees. It is well to be reminded that the photocatalytic hydrogen evolution activities increase with the decreasing of the urea crystals size in the following order (Figure 5b): U-ethanol-derived DACN ( $3920 \mu\text{mol h}^{-1} \text{g}^{-1}$ ) < GCN ( $4365 \mu\text{mol h}^{-1} \text{g}^{-1}$ ) < U-water-derived DACN ( $6407 \mu\text{mol h}^{-1} \text{g}^{-1}$ ) < U-methanol-4-derived DACN ( $16071 \mu\text{mol h}^{-1} \text{g}^{-1}$ ) < U-acetonitrile-derived DACN ( $22577 \mu\text{mol h}^{-1} \text{g}^{-1}$ ). In addition, the HER of U-methanol-4-derived DACN ( $16071 \mu\text{mol h}^{-1} \text{g}^{-1}$ ) is smaller than that of DACN-500 ( $19280 \mu\text{mol h}^{-1} \text{g}^{-1}$ ), and the HER of U-acetonitrile-derived DACN ( $22577 \mu\text{mol h}^{-1} \text{g}^{-1}$ ) is lower than that of DACN-100 ( $37480 \mu\text{mol h}^{-1} \text{g}^{-1}$ ) but higher than that of DACN-10 ( $17545 \mu\text{mol h}^{-1} \text{g}^{-1}$ , Figure 5a). The grain size of U-methanol-4 is larger than SRU-500, however, the size of U-acetonitrile is smaller than the SRU-100 but larger than SRU-10 (Figure S10a, Figure S5g and Figure 2c). From the results above, it can be concluded that the alternative explanations (i.e. impurity or one added during the recrystallization) for the enhanced photocatalytic activities are ruled out, and the precursor size is the real reason for the significantly improved catalytic properties. Similarly, the photocatalytic hydrogen evolution activities increase with the decreasing of the urea crystals size in this order: U-methanol-1-derived DACN ( $1864 \mu\text{mol h}^{-1} \text{g}^{-1}$ ) < U-methanol-4-derived DACN ( $16071 \mu\text{mol h}^{-1} \text{g}^{-1}$ ) < U-methanol-24-derived DACN ( $29790 \mu\text{mol h}^{-1} \text{g}^{-1}$ ). Better yet, the HER of U-methanol-1-derived DACN ( $1864 \mu\text{mol h}^{-1} \text{g}^{-1}$ ) is lower than

that of U-ethanol-derived DACN ( $3920 \mu\text{mol h}^{-1} \text{g}^{-1}$ ), the HER of U-methanol-24-derived DACN ( $29790 \mu\text{mol h}^{-1} \text{g}^{-1}$ ) is higher than that of U-acetonitrile-derived DACN ( $22577 \mu\text{mol h}^{-1} \text{g}^{-1}$ ) but lower than that of DACN-100 ( $37480 \mu\text{mol h}^{-1} \text{g}^{-1}$ , Figure 5a). However, looking more closely, it was clear that the grain size of U-methanol-1 is larger than U-ethanol, the grain size of U-methanol-24 is larger than SRU-100, suggesting the photocatalytic performance increases with the decreasing of the urea crystals size (Figure S10a, Figure S5 and Figure 2c). Although the grain size of SRU-100 is larger than U-acetonitrile, the HER of DACN-100 is better than that of U-acetonitrile-derived DACN, further demonstrating the precursor size has a significant effect on the performance of the final DACN products.

**Table S5.** Summary of GCN-based photocatalysts for hydrogen evolution rate (HER) and apparent quantum efficiency (AQE).

| Samples <sup>[a]</sup>                                  | HER<br>$\mu\text{mol h}^{-1}$ | HER<br>$\mu\text{mol h}^{-1} \text{ g}^{-1}$ | AQE                                  | ref          |
|---------------------------------------------------------|-------------------------------|----------------------------------------------|--------------------------------------|--------------|
| DACN-100                                                | 1874<br>(50 mg)               | 37480                                        | 34.4<br>(400 nm)<br>31.9<br>(420 nm) | This<br>work |
| UGCNP <sub>s</sub>                                      | 68.3<br>50 mg                 | 1365                                         | 3.6<br>(420 nm)                      | s1           |
| LCN <sub>180-96</sub>                                   | 6.1<br>(50 mg)                | 122                                          | N/A                                  | s2           |
| HCNS                                                    | 224<br>(50 mg)                | 4480                                         | 7.5<br>(420 nm)                      | s3           |
| NS-g-C <sub>3</sub> N <sub>4</sub>                      | 574<br>(40 mg)                | 14350                                        | 9.6<br>(420)                         | s4           |
| PCN                                                     | 18.8<br>(4.69<br>mg)          | 401                                          | N/A                                  | s5           |
| HR-CN                                                   | 74<br>(20 mg)                 | 3700                                         | N/A                                  | s6           |
| g-C <sub>3</sub> N <sub>4</sub> nanosheets <sup>1</sup> | 93<br>(50 mg)                 | 1860                                         | 3.75<br>(420 nm)                     | s7           |
| g-C <sub>3</sub> N <sub>4</sub> nanosheets <sup>2</sup> | <i>ca.</i> 33<br>(50 mg)      | 650                                          | N/A                                  | s8           |
| HGCN                                                    | 82.9<br>(10 mg)               | 8290                                         | N/A                                  | s9           |
| mpg-C <sub>3</sub> N <sub>4</sub>                       | 149<br>(1000                  | 149                                          | N/A                                  | s10          |

|                                            |                          |                 |                  |     |
|--------------------------------------------|--------------------------|-----------------|------------------|-----|
|                                            | mg)                      |                 |                  |     |
| PTI<br>nanosheets                          | 3.5<br>(2 mg)            | 1750            | 1.3<br>(400 nm)  | s11 |
| IGCNSs                                     | 44.5<br>(50 mg)          | 890             | 3.0<br>(420 nm)  | s12 |
| CNUB                                       | 278<br>(50 mg)           | 5560            | N/A              | s13 |
| ACN                                        | 7.85<br>(50mg)           | 157.9           | N/A              | s14 |
| CN-NS                                      | <i>ca.</i> 310<br>(50mg) | <i>ca.</i> 6200 | N/A              | s15 |
| PCN-S                                      | 79.8<br>(50mg)           | 1596            | 3.56<br>(420 nm) | s16 |
| Urea-based g-C <sub>3</sub> N <sub>4</sub> | 388.24<br>(20mg)         | 19412           | 26.5<br>(400 nm) | s17 |
| monolayer<br>nanomesh                      | 85.1<br>(10 mg)          | 8510            | 5.1<br>(420 nm)  | s18 |
| “seaweed”                                  | 99<br>(10 mg)            | 9900            | 7.8<br>(420 nm)  | s19 |
| P-TCN                                      | 67<br>(100 mg)           | 670             | 5.68<br>(420 nm) | s20 |
| g-C <sub>3</sub> N <sub>x</sub>            | 69<br>(10 mg)            | 6900            |                  | s21 |

<sup>[a]</sup> The photocatalysts listed in Table S5 were loaded with 3 wt% Pt co-catalyst; 10 vol% triethanolamine scavenger in an aqueous solution, excepting PCN which was loaded with 1 wt% Pt co-catalyst, 65 vol% triethanolamine scavenger in an aqueous solution, ACN was loaded with 6 wt% Pt co-catalyst, PCN-S which was loaded with 1 wt% Pt co-catalyst, 20 vol% triethanolamine scavenger in an aqueous solution. HER rates for external samples were measured by using a  $\lambda \geq 420$  nm long-pass filter either, except Urea-based g-C<sub>3</sub>N<sub>4</sub>, which was measured by using a  $\lambda \geq 400$  nm long-pass filter either. N/A= no applicable.

## References

1. Han, Q.; Zhao, F.; Hu, C. G.; Lv, L. X.; Zhang, Z. P.; Chen, N. Qu, L. T. Facile Production of Ultrathin Graphitic Carbon Nitride Nanoplatelets for Efficient Visible-Light Water Splitting. *Nano Res.*, **2015**, *8*, 1718–1728.
2. Cui, Y. J.; Ding, Z. X.; Fu, X. Z.; Wang, X. C. Construction of Conjugated Carbon Nitride Nanoarchitectures in Solution at Low Temperature for Photoredox Catalysis. *Angew. Chem. Int. Ed.*, **2012**, *51*, 11814–11818.
3. Sun, J. H.; Zhang, J. S.; Zhang, M. W.; Antonietti, M.; Fu, X. Z.; Wang, X. C. Bioinspired Hollow Semiconductor Nanosheets as Photosynthetic Nanoparticles. *Nat. Commun.*, **2012**, *3*, 1139–1145.
4. Zhang, J. S.; Zhang, M. W.; Yang, C.; Wang, X. C. Nanospherical Carbon Nitride Frameworks with Sharp Edges Accelerating Charge Collection and Separation at A Soft Photocatalytic Interface. *Adv. Mater.* **2014**, *26*, 4121–4126.
5. Hong, J.; Yin, S.; Pan, Y.; Han, J.; Zhou, T.; Xu, R. Porous Carbon Nitride Nanosheets for Enhanced Photocatalytic Activities. *Nanoscale*, **2014**, *6*, 14984–14990.
6. Zheng, Y.; Lin, L. H.; Ye, X. J.; Guo, F. S.; Wang, X. C. Helical Graphitic Carbon Nitrides with Photocatalytic and Optical Activities. *Angew. Chem. Int. Ed.*, **2014**, *53*, 11926–11930.
7. Yang, S. B.; Gong, Y. J.; Zhang, J. S.; Zhan, L.; Ma, L. L.; Fang, Z. Y.; Vajtai, R.; Wang, X. C.; Ajayan, P. M. Exfoliated Graphitic Carbon Nitride Nanosheets as Efficient Catalysts for Hydrogen Evolution Under Visible Light. *Adv. Mater.*, **2013**, *25*, 2452–2457.
8. Niu, P.; Zhang, L.; Liu, G.; Cheng, H. M. Graphene-Like Carbon Nitride Nanosheets for Improved Photocatalytic Activities. *Adv. Funct. Mater.*, **2012**, *22*, 4763–4770.
9. Liang, Q. H.; Li, Z.; Huang, Z. H.; Kang, F. Y.; Yang, Q. H. Holey Graphitic Carbon Nitride Nanosheets with Carbon Vacancies for Highly Improved Photocatalytic Hydrogen Production. *Adv. Funct. Mater.*, **2015**, *25*, 6885–6892.
10. Wang, X.; Maeda, K.; Chen, X.; Takanabe, K.; Domen, K.; Hou, Y.; Fu, X.;

- Antonietti, M. Polymer Semiconductors for Artificial Photosynthesis: Hydrogen Evolution by Mesoporous Graphitic Carbon Nitride with Visible Light. *J. Am. Chem. Soc.*, **2009**, *131*, 1680–1681.
11. Schwinghammer, K.; Mesch, M. B.; Duppel, V.; Ziegler, C.; Senker, J.; Lotsch, B. V. Crystalline Carbon Nitride Nanosheets for Improved Visible-Light Hydrogen Evolution. *J. Am. Chem. Soc.*, **2014**, *136*, 1730–1733.
  12. Han, Q.; Hu, C. G.; Zhao, F.; Zhang, Z. P.; Chen, N.; Qu, L. T. One-Step Preparation of Iodine-Doped Graphitic Carbon Nitride Nanosheets as Efficient Photocatalysts for Visible Light Water Splitting. *J. Mater. Chem. A*, **2015**, *3*, 4612–4619.
  13. Lin, Z. Z.; Wang, X. C. Nanostructure Engineering and Doping of Conjugated Carbon Nitride Semiconductors for Hydrogen Photosynthesis. *Angew. Chem. Int. Ed.*, **2013**, *52*, 1735–1738.
  14. Kang, Y.; Yang, Y.; Yin, L.; Kang, X.; Liu, G.; Cheng, H. M. An Amorphous Carbon Nitride Photocatalyst with Greatly Extended Visible-Light-Responsive for Photocatalytic Hydrogen Generation. *Adv. Mater.*, **2015**, *27*, 4572–4577.
  15. Liu, G. G.; Wang, T.; Zhang, H. B.; Meng, X. G.; Hao, D.; Chang, K.; Li, P.; Kako, T.; Ye, J. H. Nature-Inspired Environmental “Phosphorylation” Boosts Photocatalytic H<sub>2</sub> Production over Carbon Nitride Nanosheets under Visible-Light Irradiation. *Angew. Chem. Int. Ed.* **2015**, *54*, 13561–13565.
  16. Ran, J. R.; Ma, T. Y.; Gao, G. P.; Du, X. W.; Qiao, S. Z. Porous P-Doped Graphitic Carbon Nitride Nanosheets for Synergistically Enhanced Visible-Light Photocatalytic H<sub>2</sub> Production. *Energy Environ. Sci.*, **2015**, *8*, 3708–3717.
  17. Martin, D. J.; Qiu, K. P.; Shevlin, S. A.; Handoko, A. D.; Chen, X. W.; Guo, Z. X.; Tang, J. W. Highly Efficient Photocatalytic H<sub>2</sub> Evolution from Water using Visible Light and Structure-Controlled Graphitic Carbon Nitride. *Angew. Chem. Int. Ed.*, **2014**, *53*, 9240–9245.
  18. Han, Q.; Wang, B.; Gao, J.; Cheng, Z. H.; Zhao, Y.; Zhang, Z. P.; Qu, L. T. Atomically Thin Mesoporous Nanomesh of Graphitic C<sub>3</sub>N<sub>4</sub> for High-Efficiency Photocatalytic Hydrogen Evolution. *ACS Nano*, **2016**, *10*, 2745–2751.



19. Han, Q.; Wang, B.; Zhao, Y.; Hu, C. G.; Qu, L. T. A Graphitic-C<sub>3</sub>N<sub>4</sub> “Seaweed” Architecture for Enhanced Hydrogen Evolution. *Angew. Chem. Int. Ed.*, **2015**, *54*, 11433–11437.
20. Guo, S.; Deng, Z. P.; Li, M. X.; Jiang, B. J.; Tian, C. G.; Pan, Q. J.; Fu, H. G. Phosphorus-Doped Carbon Nitride Tubes with a Layered Micro-nanostructure for Enhanced Visible-Light Photocatalytic Hydrogen Evolution. *Angew. Chem. Int. Ed.*, **2016**, *55*, 1830–1834.
21. Yu, H. J.; Shi, R.; Zhao, Y. X.; Bian, T.; Zhao, Y. F.; Zhou, C.; Waterhouse, G. I. N.; Wu, L. Z.; Tung, C. H.; Zhang, T. R. Alkali-Assisted Synthesis of Nitrogen Deficient Graphitic Carbon Nitride with Tunable Band Structures for Efficient Visible-Light-Driven Hydrogen Evolution. *Adv. Mater.*, **2017**, *29*, 1605148.
